# Supplementary material for: Standardization and Validation of Fluorescence-Based Quantitative Assay to Study Human Platelet Adhesion to Extracellular-Matrix in a 384-Well Plate
Source: PubMed Central journal article supplement (PMC7554887; doi:10.3390/ijms21186539), 2020-09-07
Supplement: ijms-21-06539-s001.pdf [file ijms-21-06539-s001.pdf]

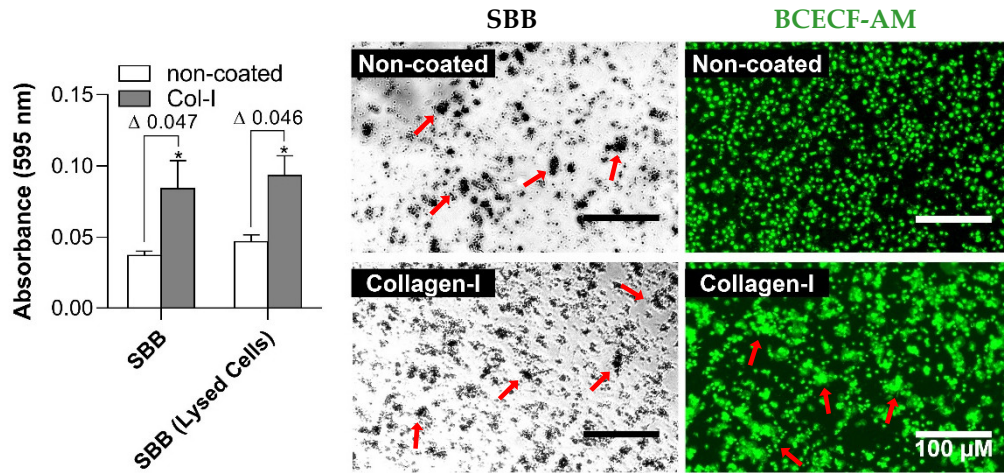

**Supplemental Figure 1.** Platelet adhesion detection with SBB. Coating of 96-well microplates with collagen-I (4  $\mu\text{g}/\text{mL}$  in 50  $\mu\text{L}$ ), or incubation with distilled water, were performed for 1 h at 37°C. After blocking the wells with BSA (0.03%), human washed platelets ( $8 \times 10^4 / \mu\text{L}$  in 100  $\mu\text{L}$ ) were added, followed by incubation for 1 h at 37°C. Non-adherent platelets were washed away with tyrode buffer. Sudan Black B (SBB) was used as previous published by Xu and cols [1]. Briefly, aliquots of PRP (1 mL) were distributed in 2 mL centrifuges tubes containing 22.5  $\mu\text{M}$  prostaglandin E1 (PGE1) and centrifuged at 10 000  $\times g$  for 30 sec. The platelet pellet was resuspended in magnesium- and calcium-free tyrode buffer pH 6.2, and platelets were incubated for 30 min with a filtered solution of SBB in 70% ethanol, added at a volume ratio of 1:20. Next, platelets were washed in presence of prostaglandin E1 and resuspended in tyrode buffer as described in the method section 4.2. Absorbance intensity was measured using a plate reader (VictorX, PerkinElmer). Images were acquired using a fluorescence microscopy (Eclipse Ti2, Nikon) with a 20x objective and SBB-stained platelets were compared to BCECF-AM-labeled platelets. Red arrows indicate platelet aggregates. Absorbance values of collagen I-coated surfaces blocked with BSA was compared to BSA alone (non-coated) for each experimental group by test-t (\* $P < 0.05$ , values presented as SEM resulting from duplicate average of four independent experiments).

## Supplemental Standard Operating Procedures (SOP): Human Platelet Adhesion Assay

### I. Material

#### I.1. Plates references

|                                                                                |                                                                                  |
|--------------------------------------------------------------------------------|----------------------------------------------------------------------------------|
| Nunc MaxiSorp™<br>96-well clear<br>flat bottom<br>(Invitrogen™,<br>44-2404-21) | Greiner Bio-One<br>384-well clear<br>flat bottom<br>(Greiner Bio-One,<br>781186) |
|--------------------------------------------------------------------------------|----------------------------------------------------------------------------------|

#### I.2. ECM proteins references

Fibrinogen (Sigma, F8630), fibronectin (Sigma, F4759), non-fibrillar collagen type- (Sigma, C7661), fibrillar collagen type-1 (möLab, 0203009), collagen type-IV (Sigma, C7521), laminin-411 (BioLamina, LN411-02), laminin-511 (BioLamina, LN511-02), and collagen-related peptide (CambCol Laboratories, CRP-XL).

### *I.3. Reagents References*

- BSA (Sigma, A7906).
- Tyrode Buffer containing 137mM NaCl (S7653, Sigma), 2.7mM KCl (P9333, Sigma), 3mM NaH<sub>2</sub>PO<sub>4</sub> (S3139, Sigma), 10mM Hepes (A1069, ITW Reagents), 5.6mM Glucose (G5400, Sigma), 10mM NaHCO<sub>3</sub> (C2680, Bachmann-Lehrmittel AG), 1mM Magnesium Chloride Hexahydrate (63068, Sigma), and 2 mM Sodium Chloride (C1016, Sigma).

### *I.4. Dye Reference*

- BCECF-AM (Sigma, B8806)

### *I.5. Devices References*

- Plate reader (PerkinElmer, Victor X3)
- Microscope (Nikon Eclipse Ti2)

## **II. Experimental Protocol**

1. Add each substrate solution diluted in distillate water (dH<sub>2</sub>O) into the wells:
  - a. 20  $\mu$ L for 384 -well plate
  - b. 50  $\mu$ L for 96-well plateNote: Submaximal concentrations of each substrate  
Fibrinogen (1 to 2 mg/mL), Fibronectin (20  $\mu$ g/mL), Non-fibrillar collagen type-(2 to 4  $\mu$ g/mL), Fibrillar collagen type-1 (64  $\mu$ g/mL), Collagen IV (2 to 4  $\mu$ g/mL), Laminin 411 (7.5 to 8.75  $\mu$ g/mL), Laminin 511 (10 to 15  $\mu$ g/mL), and Collagen-related peptide (10  $\mu$ g/mL).
2. Spin down the plate containing the ECM using a centrifuge. Note: speed suggestion 300 rpm for 60 seconds.
3. Incubate the plate at 37°C for 1 hour.
4. Discard the unbound ECM proteins in a single movement by turning the plate upside down followed by a sudden vertical motion over a sink.
5. Wash the wells with:
  - a. 30  $\mu$ L of dH<sub>2</sub>O for 384-well plate.
  - b. 100  $\mu$ L of dH<sub>2</sub>O for 96-well plate.
6. Discard the dH<sub>2</sub>O in a single movement by turning the plate upside down followed by a sudden vertical motion over a sink.
7. Wash the wells with:
  - a. 30  $\mu$ L of dH<sub>2</sub>O for 384-well plate
  - b. 100  $\mu$ L of dH<sub>2</sub>O for 96-well plate.
8. Discard the dH<sub>2</sub>O in a single movement by turning the plate upside down followed by a sudden vertical motion over a sink. Wash the wells with:
  - a. 30  $\mu$ L of dH<sub>2</sub>O for 384-well plate
  - b. 100  $\mu$ L of dH<sub>2</sub>O for 96-well plate.
9. Discard the dH<sub>2</sub>O in a single movement by turning the plate upside down followed by a sudden vertical motion over a sink. Block the wells using 0.03% BSA:

- a. 30  $\mu$ L of BSA for 384-well plate
  - b. 100  $\mu$ L of BSA for 96-well plate.
10. Spin down the plate containing the ECM proteins using a centrifuge – Suggestion: 300 rpm – 60 seconds.
11. Incubate the plate at 37°C for 1 hour.
12. Discard the excess of BSA in a single movement by turning the plate upside down followed by a sudden vertical motion over a sink.
13. Wash the wells with:
  - a. 30  $\mu$ L of dH<sub>2</sub>O for 384-well plate
  - b. 100  $\mu$ L of dH<sub>2</sub>O for 96-well plate.
14. Discard the dH<sub>2</sub>O in a single movement by turning the plate upside down followed by a sudden vertical motion over a sink. Wash the wells with:
  - a. 30  $\mu$ L of dH<sub>2</sub>O for 384-well plate
  - b. 100  $\mu$ L of dH<sub>2</sub>O for 96-well plate
15. Discard the dH<sub>2</sub>O in a single movement by turning the plate upside down followed by a sudden vertical motion over a sink. Wash the wells with:
  - a. 30  $\mu$ L of dH<sub>2</sub>O for 384-well plate
  - b. 100  $\mu$ L of dH<sub>2</sub>O for 96-well plate
16. Discard the dH<sub>2</sub>O in a single movement by turning the plate upside down followed by a sudden vertical motion over a sink. Note: Keep dH<sub>2</sub>O in the wells in case platelets are not ready to be added, avoid ECM-coated wells getting dry.
17. Add human washed platelets into the wells under different experimental conditions at a concentration of 80 000 /  $\mu$ L diluted in tyrode buffer pH 7.4.
18. Spin down the plate containing the ECM using a centrifuge – Suggestion: 300 rpm – 60 seconds.
19. Incubate the plate for 1 hour at 37°C to allow platelets to adhere.
20. Discard the non-adherent platelets in a single movement by turning the plate upside down followed by a sudden vertical motion over a sink.
21. Wash the wells with:
  - a. 30  $\mu$ L of tyrode buffer for 384-well plate
  - b. 100  $\mu$ L of tyrode buffer for 96-well plate.
22. Discard the tyrode buffer in a single movement by turning the plate upside down followed by a sudden vertical motion over a sink.
23. Add the BCECF-AM solution at the concentration of 4  $\mu$ g/mL diluted in tyrode buffer:
  - a. 20  $\mu$ L for the 384 well-plate
  - b. 50  $\mu$ L for the 96-well-plate.

Note: BCECF-AM is light sensitive and it has to be protected from light.
24. Spin down the plate containing the ECM proteins using a centrifuge – Suggestion: 300 rpm – 60 seconds.
25. Incubate the plate for 30 minutes at 37°C.
26. Discard the excess of BCECF-AM in a single movement by turning the plate upside down followed by a sudden vertical motion over a sink.
27. Wash the wells with:

- a. 30  $\mu$ L of tyrode buffer for 384-well plate
  - b. 100  $\mu$ L of tyrode buffer for 96-well plate.
28. Discard the tyrode buffer in a single movement by turning the plate upside down followed by a sudden vertical motion over a sink. Add tyrode buffer to the wells:
  - a. 30  $\mu$ L of tyrode buffer for 384-well plate
  - b. 100  $\mu$ L of tyrode buffer for 96-well plate.
29. Record fluorescence with the microplate reader spectrophotometer with 485nm as excitation wavelength and 535nm as emission wavelengths.
30. Images can be acquired using a fluorescence microscope with a 20x objective (Nikon CFI S Plan Fluor ELWD) and a DS-Ri2 camera (4908 $\times$ 3264 pixel).
31. At the end of the experiment discard the plates in a proper waste bin.

### **Reference**

1. Xu, X.-X.; Gao, X.-H.; Pan, R.; Lu, D.; Dai, Y. A simple adhesion assay for studying interactions between platelets and endothelial cells in vitro. *Cytotechnology* 2010, 62, 17–22, doi:10.1007/s10616-010-9256-2.
